# Supplementary material for: Assembly kinetics determine the structure of keratin networks
Source: Royal Society of Chemistry journal article supplement (doi:10.1039/c2sm26032h), 2012-01-01
Supplement: c2sm26032h.pdf [file c2sm26032h.pdf]

## Supporting Material for Kayser *et al.*

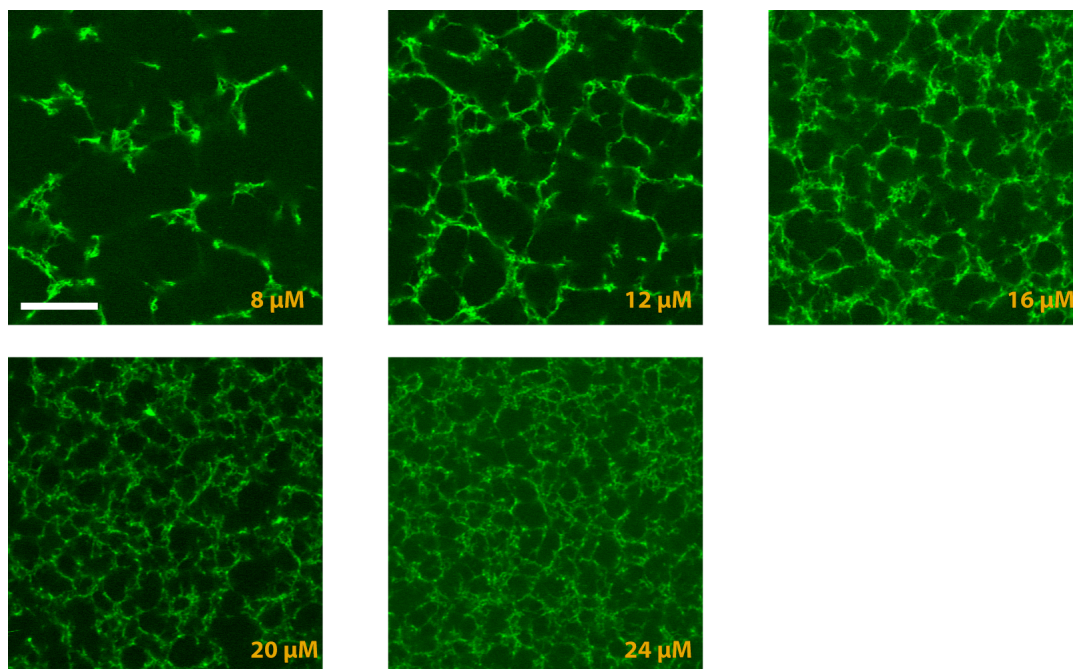

**Fig. S1:** The mesoscopic and microscopic structure of the network depends on the protein concentration. Images are confocal micrographs. The protein concentrations are denoted in the figure. The scale bar is 10  $\mu\text{m}$ . The corresponding quantification is shown in Fig. 3e.

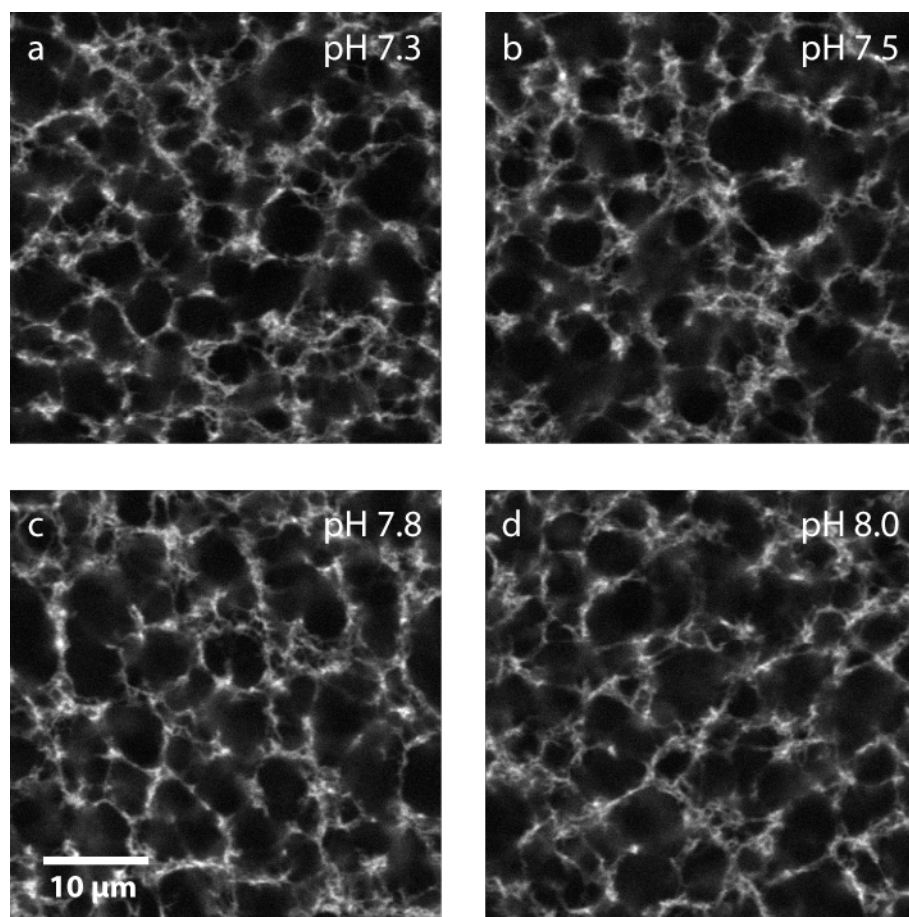

**Fig. S2:** pH has no effect on network structure. The confocal micrographs show networks assembled at a protein concentration of  $c_K = 12 \mu\text{M}$ . The final pH was measured independently in conditions equal to that of the sample (without the protein), as denoted in the figure.

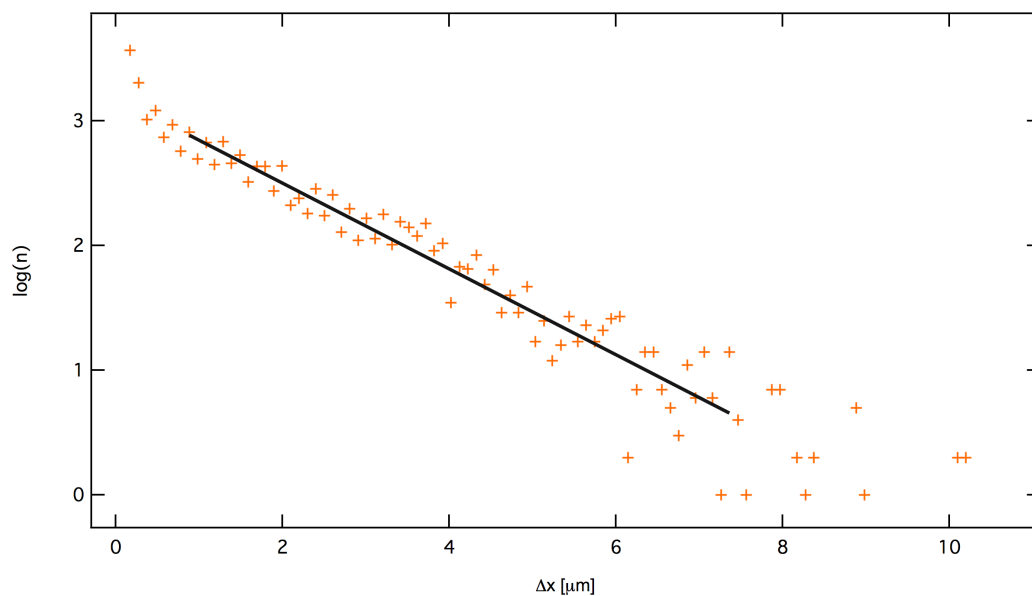

**Fig. S3:** The network morphology is quantified by evaluating the distribution of distances between neighboring structures. As shown in the depicted example, the histograms of distances  $\Delta x$  exhibit an exponential decay (orange crosses: data, black line: fit to the data). The negative inverse slope of the fit gives the characteristic mesh size  $\xi$ .
